# Supplementary material
Source: PubMed Central journal article supplement (PMC4815908)
Supplement: NIHMS748929-supplement.pdf [file NIHMS748929-supplement.pdf]

# Natural product-based synthesis of novel anti-infective isothiocyanate- and isoselenocyanate-functionalized amphilectane diterpenes

Karinel Nieves<sup>a</sup>, Jacques Prudhomme<sup>b</sup>, Karine G. Le Roch<sup>b</sup>, Scott G. Franzblau<sup>c</sup>, and Abimael D. Rodríguez<sup>a,\*</sup>

<sup>a</sup>*Molecular Sciences Research Center, University of Puerto Rico, 1390 Ponce de León Avenue, San Juan, Puerto Rico 00926*

<sup>b</sup>*Department of Cell Biology and Neuroscience, University of California at Riverside, California 92521*

<sup>c</sup>*Institute for Tuberculosis Research, College of Pharmacy, University of Illinois at Chicago, Chicago, Illinois 60612*

## Supplementary Data

### Experimental Section

**General Techniques.** All of the reactions requiring anhydrous conditions were conducted in flame-dried glass apparatus under an atmosphere of argon. Column chromatography (CC) was performed on silica gel (35–75  $\mu\text{m}$ ); reactions were followed by TLC analysis using glass pre-coated silica gel plates with fluorescent indicator (254 nm) and visualized with a UV lamp or  $\text{I}_2$  vapors. Semipreparative RP-HPLC was performed using a UV detector set at 254 nm and a column with 5  $\mu\text{m}$ , 250 x 4.6 mm size with a flow rate of 1.0 mL/min. THF and commercially available reagents were purchased and used as received without further purification. Optical rotations were recorded with a polarimeter using a 0.5 mL capacity cell with 1 dm path length. Infrared spectra were recorded using thin films supported on NaCl discs.  $^1\text{H}$  and  $^{13}\text{C}$  NMR spectra were recorded in Fourier transform mode at the specified field strength on a 700 MHz spectrometer. Spectra were obtained on  $\text{CDCl}_3$  solutions in 5 mm diameter tubes, and chemical shifts are quoted in parts per million relative to the

residual signals of chloroform ( $\delta_{\text{H}} = 7.26$  ppm,  $\delta_{\text{C}} = 77.0$  ppm). Multiplicities in the  $^1\text{H}$  NMR spectra are described as follows: s = singlet, d = doublet, t = triplet, q = quartet, m = multiplet, br = broad; coupling constants are reported in hertz. High-resolution mass spectrometry (HRMS) was performed using a quadrupole mass analyzer, and the data are reported with ion mass/charge ( $m/z$ ) ratios as values in atomic mass units. Yields shown are based on recovered starting material.

**Animal Material.** The Caribbean sponge *Svenzea flava* (phylum Porifera; class Demospongiae; order Halichondrida; family Dictyonellidae) was collected at a depth of 89 feet by scuba off Mona Island, Puerto Rico, in July 2006. A voucher specimen (no. IM06-04) is stored at the Chemistry Department of the University of Puerto Rico, Río Piedras Campus. The species *Svenzea flava* was originally classified as *Pseudoaxinella flava*.<sup>1</sup> Despite lacking dark granulous cells that are a signature characteristic of other species within the genus *Svenzea*, it has been accepted as *Svenzea flava*.<sup>2</sup>

**Isolation and Purification of (–)-8,15-Diisocyano-11(20)-amphilectene (1).** The known sponge metabolite (–)-8,15-diisocyano-11(20)-amphilectene (**1**)<sup>3</sup> was obtained pure as white crystals (528 mg) from freshly collected sponge specimens as previously described (the sponge was originally reported by our group as *Hymeniacidon* sp.).<sup>4</sup> The structure characterization of **1** was established on the basis of IR, UV,  $[\alpha]_{\text{D}}$ , MS, and  $^1\text{H}$  and  $^{13}\text{C}$  NMR spectroscopic analyses.

**Synthesis of Isothiocyanate-Containing Amphilectanes.** To a 25° C solution of diisocyanide **1** (37.0 mg, 0.11 mmol) in dry THF (5.0 mL) was added selenium (0.9 mg, 0.01 mmol), sulfur (4.0 mg, 0.12 mmol), and TEA (76  $\mu\text{L}$ , 0.5 mmol). After refluxing for 4 h the reaction mixture was allowed to cool to 25° C and then concentrated *in vacuo*. The crude oil obtained was purified by flash-silica gel CC with 100% hexane to afford unreacted **1** (23 mg) followed by another fraction consisting of a mixture of isothiocyanate-containing products that was purified by HPLC (MeOH/H<sub>2</sub>O, 88/12). Retention times were 20.4 min for the more polar mixture of **3** and **4** (10 mg, 53%) and 23.8 min for the less polar compound **2** (3.0 mg, 18%).

*8,15-Diisothiocyano-11(20)-amphilectene (2)*: colorless oil;  $[\alpha]_D^{20}$  -108.0 (*c* 0.25, CHCl<sub>3</sub>); UV (MeOH)  $\lambda_{\max}$  ( $\epsilon$ ) 202 (19471) nm; IR (film)  $\nu_{\max}$  2926, 2857, 2095, 1728, 1459, 1262 cm<sup>-1</sup>; <sup>1</sup>H NMR (700 MHz, CDCl<sub>3</sub>)  $\delta$  4.87 (br s, 1H, H-20 $\beta$ ), 4.61 (br s, 1H, H-20 $\alpha$ ), 2.34 (m, 1H, H-9 $\beta$ ), 2.26 (m, 2H, H-10), 2.16 (m, 1H, H-2 $\beta$ ), 2.06 (dd, *J* = 1.3, 14.6 Hz, 1H, H-14 $\beta$ ), 2.00 (m, 1H, H-5 $\beta$ ), 1.89 (m, 1H, H-1), 1.75 (t, *J* = 10.8 Hz, 1H, H-12), 1.55 (m, 2H, H-6), 1.47 (s, 3H, H-17), 1.44 (s, 3H, H-16), 1.43–1.35 (br envelope, 2H, H-7, H-9 $\alpha$ ), 1.28 (m, 1H, H-14 $\alpha$ ), 1.11–1.00 (br envelope, 3H, H-3, H-4, H-13), 0.99 (d, *J* = 6.3 Hz, 3H, H-19), 0.94 (d, *J* = 6.1 Hz, 3H, H-18), 0.92–0.83 (br envelope, 2H, H-2 $\alpha$ , H-5 $\alpha$ ); <sup>13</sup>C NMR (175 MHz, CDCl<sub>3</sub>)  $\delta$  150.2 (C, C-11), 131.1 (C, C-21), 130.4 (C, C-22), 106.1 (CH<sub>2</sub>, C-20), 69.6 (C, C-8), 60.6 (C, C-15), 56.9 (CH, C-13), 46.8 (CH<sub>2</sub>, C-14), 46.7 (CH, C-12), 43.3 (CH, C-4), 42.5 (CH, C-7), 41.1 (CH<sub>2</sub>, C-2), 40.1 (CH<sub>2</sub>, C-9), 35.7 (CH, C-3), 34.1 (CH<sub>2</sub>, C-10), 33.2 (CH, C-1), 31.9 (CH<sub>3</sub>, C-17), 30.5 (CH<sub>2</sub>, C-6), 29.9 (CH<sub>2</sub>, C-5), 29.4 (CH<sub>3</sub>, C-16), 19.9 (CH<sub>3</sub>, C-18), 16.1 (CH<sub>3</sub>, C-19); EI-LRMS *m/z* [M]<sup>+</sup> 388 (3), 330 (27), 329 (22), 271 (100), 255 (26), 215 (58), 201(30), 159 (31); EI-HRMS *m/z* calcd for C<sub>22</sub>H<sub>32</sub>N<sub>2</sub>S<sub>2</sub> [M]<sup>+</sup> 388.2007, found 388.2007.

*8-Isouthiocyano-15-isoselenocyano-11(20)-amphilectene (3) and 8-Isoselenocyano-15-isothiocyano-11(20)-amphilectene (4) (2:3 mixture of isomers)*: white solid; UV (MeOH)  $\lambda_{\max}$  ( $\epsilon$ ) 192 (962), 202 (4457) nm; IR (film)  $\nu_{\max}$  2920, 2870, 2255, 2096, 1453 cm<sup>-1</sup>; <sup>1</sup>H NMR (700 MHz, CDCl<sub>3</sub>) (major isomer)  $\delta$  4.88 (br s, 1H, H-20 $\beta$ ), 4.63 (br s, 1H, H-20 $\alpha$ ), 2.40–1.99 (br envelope, 6H, H-2 $\beta$ , H-5 $\beta$ , H-9 $\beta$ , H-10 $\alpha\beta$ , H-14 $\beta$ ), 1.90 (m, 1H, H-1), 1.75 (m, 1H, H-12), 1.60–1.26 (br envelope, 5H, H-6 $\alpha\beta$ , H-7, H-9 $\alpha$ , H-14 $\alpha$ ), 1.47 (s, 3H, H-17), 1.44 (s, 3H, H-16), 1.14–0.84 (br envelope, 5H, H-2 $\alpha$ , H-3, H-4, H-5 $\alpha$ , H-13), 1.00 (d, *J* = 6.4 Hz, 3H, H-19), 0.95 (d, *J* = 6.2 Hz, 3H, H-18); (minor isomer)  $\delta$  4.87 (br s, 1H, H-20 $\beta$ ), 4.59 (br s, 1H, H-20 $\alpha$ ), 2.40–1.99 (br envelope, 6H, H-2 $\beta$ , H-5 $\beta$ , H-9 $\beta$ , H-10 $\alpha\beta$ , H-14 $\beta$ ), 1.90 (m, 1H, H-1), 1.75 (m, 1H, H-12), 1.60–1.26 (br envelope, 5H, H-6 $\alpha\beta$ , H-7, H-9 $\alpha$ , H-14 $\alpha$ ), 1.51 (s, 3H, H-17), 1.44 (s, 3H, H-16), 1.14–0.84 (br envelope, 5H, H-2 $\alpha$ , H-3, H-4, H-5 $\alpha$ , H-13), 0.99 (d, *J* = 6.3 Hz, 3H, H-19), 0.96 (d, *J* = 6.1 Hz, 3H, H-18); <sup>13</sup>C NMR (175 MHz,

CDCl<sub>3</sub>) (major isomer)  $\delta$  149.8 (C, C-11), 130.4 (C, C-22), 124.4 (C, C-21), 106.4 (CH<sub>2</sub>, C-20), 71.0 (C, C-8), 60.6 (C, C-15), 56.7 (CH, C-13), 46.8 (CH<sub>2</sub>, C-14), 46.6 (CH, C-12), 43.3 (CH, C-4), 42.3 (CH, C-7), 41.1 (CH<sub>2</sub>, C-2), 39.8 (CH<sub>2</sub>, C-9), 35.7 (CH, C-3), 33.9 (CH<sub>2</sub>, C-10), 33.2 (CH, C-1), 31.9 (CH<sub>3</sub>, C-17), 30.4 (CH<sub>2</sub>, C-6), 29.8 (CH<sub>2</sub>, C-5), 29.5 (CH<sub>3</sub>, C-16), 19.8 (CH<sub>3</sub>, C-18), 16.1 (CH<sub>3</sub>, C-19); (minor isomer)  $\delta$  150.1 (C, C-11), 131.2 (C-21), 122.4 (C, C-22), 106.1 (CH<sub>2</sub>, C-20), 69.6 (C, C-8), 61.3 (C, C-15), 56.9 (CH, C-13), 46.7 (CH, C-12), 46.5 (CH<sub>2</sub>, C-14), 43.2 (CH, C-4), 42.5 (CH, C-7), 41.0 (CH<sub>2</sub>, C-2), 40.1 (CH<sub>2</sub>, C-9), 35.6 (CH, C-3), 34.0 (CH<sub>2</sub>, C-10), 33.1 (CH, C-1), 31.6 (CH<sub>3</sub>, C-17), 30.5 (CH<sub>2</sub>, C-6), 29.9 (CH<sub>2</sub>, C-5), 29.0 (CH<sub>3</sub>, C-16), 19.9 (CH<sub>3</sub>, C-18), 16.0 (CH<sub>3</sub>, C-19); EI-LRMS  $m/z$  [M]<sup>+</sup> 436 (31), 330 (34), 329 (46), 271 (95), 270 (85), 255 (100), 215 (88), 201 (65), 159 (42); EI-HRMS  $m/z$  calcd for C<sub>22</sub>H<sub>32</sub>N<sub>2</sub>S<sup>80</sup>Se [M]<sup>+</sup> 436.1451, found 436.1459. Multiple attempts to separate the mixture of regioisomers **3** and **4** by normal- and reversed-phase HPLC proved unsuccessful.

**General Procedure for Synthesis of Isoselenocyanate-Containing Amphilectanes.** *General*

*Procedure A.* To a 25°C solution of diisocyanide **1** (12.0 mg, 0.04 mmol) in dry THF (2.0 mL) was added selenium (6.0 mg, 0.08 mmol) and TEA (0.07 mL, 0.5 mmol). After stirring for 24 h the reaction mixture was concentrated *in vacuo* and the crude oil obtained was purified by flash-silica gel CC using a 99:1 mixture of hexane/EtOAc to afford **5** as the sole product (14 mg, 78%).

*General Procedure B.* To a 25°C solution of diisocyanide **1** (16.0 mg, 0.05 mmol) in dry THF (2.0 mL) was added selenium (8.0 mg, 0.1 mmol) and TEA (0.1 mL, 0.7 mmol). After refluxing for 12 h the reaction mixture was allowed to cool to 25° C and then concentrated *in vacuo*. The crude oil obtained was purified by flash-silica gel CC using a 99:1 mixture of hexane/EtOAc to afford a fraction consisting of a mixture of two products that was subsequently purified by HPLC (MeOH/H<sub>2</sub>O, 95/5). Retention times were 8.32 min for compound **5** (12.0 mg, 50%) and 9.29 min for compound **6** (6.0 mg, 33%).

*8,15-Diisoselenocyano-11(20)-amphilectene (5)*: colorless oil;  $[\alpha]_D^{20}$  -139.0 (*c* 1.0, CHCl<sub>3</sub>); UV (MeOH)  $\lambda_{\max}$  ( $\epsilon$ ) 202 (56143) nm; IR (film)  $\nu_{\max}$  2921, 2870, 2258, 2110, 1455 cm<sup>-1</sup>; <sup>1</sup>H NMR (700 MHz, CDCl<sub>3</sub>)  $\delta$  4.89 (br s, 1H, H-20 $\beta$ ), 4.60 (br s, 1H, H-20 $\alpha$ ), 2.38 (m, 1H, H-9 $\beta$ ), 2.30 (m, 1H, H-10 $\beta$ ), 2.24 (m, 1H, H-10 $\alpha$ ), 2.17 (m, 1H, H-2 $\beta$ ), 2.10 (dd, *J* = 1.2, 14.7 Hz, 1H, H-14 $\beta$ ), 2.02 (m, 1H, H-5 $\beta$ ), 1.91 (m, 1H, H-1), 1.75 (t, *J* = 10.9 Hz, 1H, H-12), 1.52 (s, 3H, H-17), 1.49 (s, 3H, H-16), 1.48–1.32 (br envelope, 5H, H-6 $\alpha\beta$ , H-7, H-9 $\alpha$ , H-14 $\alpha$ ), 1.14–1.02 (br envelope, 3H, H-3, H-4, H-13), 1.01 (d, *J* = 6.3 Hz, 3H, H-19), 0.96 (d, *J* = 6.3 Hz, 3H, H-18), 0.93–0.83 (br envelope, 2H, H-2 $\alpha$ , H-5 $\alpha$ ); <sup>13</sup>C NMR (175 MHz, CDCl<sub>3</sub>)  $\delta$  149.7 (C, C-11), 124.5 (C, C-21), 122.5 (C, C-22), 106.4 (CH<sub>2</sub>, C-20), 70.9 (C, C-8), 61.3 (C, C-15), 56.6 (CH, C-13), 46.7 (CH, C-12), 46.6 (CH<sub>2</sub>, C-14), 43.3 (CH, C-4), 42.3 (CH, C-7), 41.0 (CH<sub>2</sub>, C-2), 39.8 (CH<sub>2</sub>, C-9), 35.6 (CH, C-3), 33.9 (CH<sub>2</sub>, C-10), 33.2 (CH, C-1), 31.6 (CH<sub>3</sub>, C-17), 30.4 (CH<sub>2</sub>, C-6), 29.8 (CH<sub>2</sub>, C-5), 29.1 (CH<sub>3</sub>, C-16), 19.8 (CH<sub>3</sub>, C-18), 16.1 (CH<sub>3</sub>, C-19); EI-LRMS *m/z* [M]<sup>+</sup> 484 (28), 378 (23), 377 (21), 272 (45), 271 (100), 270 (86), 255 (97), 215 (94), 201 (82), 199 (65), 159 (68); EI-HRMS *m/z* calcd for C<sub>22</sub>H<sub>32</sub>N<sub>2</sub><sup>80</sup>Se<sub>2</sub> [M]<sup>+</sup> 484.0896, found 484.0902.

*8-Isoselenocyanoamphilecta-11(20),15-diene (6)*: colorless oil;  $[\alpha]_D^{20}$  + 70.0 (*c* 0.2, CHCl<sub>3</sub>); UV (MeOH)  $\lambda_{\max}$  ( $\epsilon$ ) 202 (9039) nm; IR (film)  $\nu_{\max}$  2922, 2852, 2264, 2093, 1452 cm<sup>-1</sup>; <sup>1</sup>H NMR (700 MHz, CDCl<sub>3</sub>)  $\delta$  4.86 (s, 1H, H-20 $\beta$ ), 4.76 (s, 1H, H-16 $\beta$ ), 4.67 (s, 1H, H-16 $\alpha$ ), 4.66 (s, 1H, H-20 $\alpha$ ), 2.59 (d, *J* = 14.3 Hz, 1H, H-14 $\beta$ ), 2.38 (m, 1H, H-9 $\beta$ ), 2.29 (m, 2H, H-10), 2.01 (m, 1H, H-5 $\beta$ ), 1.80 (m, 1H, H-2 $\beta$ ), 1.76 (m, 2H, H-1, H-12), 1.72 (s, 3H, H-17), 1.54 (m, 3H, H-6 $\alpha\beta$ , H-14 $\alpha$ ), 1.41 (m, 2H, H-7, H-9 $\alpha$ ), 1.04 (m, 3H, H-3, H-4, H-13), 1.00 (d, *J* = 6.4 Hz, 3H, H-19), 0.90 (d, *J* = 5.9 Hz, 3H, H-18), 0.86 (m, 1H, 5 $\alpha$ ), 0.70 (m, 1H, 2 $\alpha$ ); <sup>13</sup>C NMR (175 MHz, CDCl<sub>3</sub>)  $\delta$  149.7 (C, C-11), 144.2 (C, C-15), 123.8 (C, C-21), 111.3 (CH<sub>2</sub>, C-16), 106.1 (CH<sub>2</sub>, C-20), 70.9 (C, C-8), 56.7 (CH, C-13), 46.5 (CH, C-12), 43.6 (CH, C-4), 43.0 (CH<sub>2</sub>, C-14), 42.3 (CH, C-7), 39.8 (CH<sub>2</sub>, C-2), 39.6 (CH<sub>2</sub>, C-9), 36.0 (CH, C-3), 33.9 (CH, C-1), 33.8 (CH<sub>2</sub>, C-10), 30.5 (CH<sub>2</sub>, C-6), 29.8 (CH<sub>2</sub>, C-5), 22.6 (CH<sub>3</sub>, C-17),

19.7 (CH<sub>3</sub>, C-18), 16.1 (CH<sub>3</sub>, C-19); EI-LRMS  $m/z$  [M]<sup>+</sup> 377 (17), 297 (7), 282 (18), 272 (42), 271 (100), 270 (83), 255 (94), 215 (81), 199 (60), 159 (55), 145 (48), 105 (52), 91 (59); EI-HRMS  $m/z$  calcd for C<sub>21</sub>H<sub>31</sub>N<sup>80</sup>Se [M]<sup>+</sup> 377.1622, found 377.1626.

**Treatment of Diisoselenocyanate 5 with Elemental Sulfur to 8,15-Diisothiocyano-11(20)-amphilectene (2).** To a 25° C solution of diisoselenocyanate **5** (7.0 mg, 0.01 mmol) in dry THF (2.0 mL) was added sulfur (0.9 mg, 0.03 mmol) and TEA (9.7 μL, 0.07 mmol). After refluxing for 4 h the reaction mixture was allowed to cool to 25° C and then concentrated *in vacuo*. The crude oil obtained was purified by flash-silica gel CC with a 98:2 mixture of hexane/EtOAc to afford **2** (4.0 mg, 71%) as the sole product.

**Evaluation of Inhibition of *Plasmodium falciparum* Growth.** The 3D7 and Dd2 strains of *P. falciparum* malaria (BEI Resources, MR4/ATCC, Manassas, VA) were cultured in human type O+ erythrocytes in complete medium consisting of RPMI 1640 (Cellgro), 0.043 mg/mL gentamicin (Gibco), 0.014 mg/mL hypoxanthine (Acros), 38.5 mM HEPES (Sigma), 0.18% sodium bicarbonate (Cellgro), 0.20% glucose (MP Biomedical), 0.003 mM NaOH (Sigma), 0.2% Albumax (Gibco), and 5% human serum as previously described.<sup>5</sup> Briefly, cultures were maintained in 25-cm<sup>2</sup> flasks (Corning) at a volume of 10 mL, gassed for 30 s with 3% CO<sub>2</sub>, 1% O<sub>2</sub>, and 96% N<sub>2</sub>, and were finally incubated at 37°C. The antimalarial activity was determined with a SYBR Green based parasite proliferation assay as previously described.<sup>6</sup> After 72 h of incubation in the presence of serial dilutions of compounds, the increase of parasite DNA contained in human red blood cells was measured. The relative fluorescence values were measured using a Molecular Devices SpectraMAX Gemini EM fluorimeter (excitation 495 nm, and emission 525 nm). Data were analyzed using Microsoft Excel and were plotted using SigmaPlot 10 (Systat).

**Evaluation of antitubercular activity.** Antimycobacterial activity was determined against *Mtb* H<sub>37</sub>Rv (ATCC 27 294) in the microplate Alamar blue assay (MABA) system as described previously.<sup>7</sup> The tuberculosis drug rifampicin (RMP) was used as a positive control in the assay.

**Cytotoxicity Assay.** The cytotoxic activity of tested compounds was determined with the Vero cell line ATCC CRL-1586 using an MTS assay as outlined previously.<sup>8</sup>

## References

- (1) (a) Lehnert, H.; Van Soest, R. W. M. *Beaufortia* **1999**, *49*, 141–169. (b) Alvarez, B.; Van Soest, R. W. M.; Rützler, K. *Contrib. Zool.* **2002**, *71*, 171–176.
- (2) Alvarez, B.; Van Soest, R. W. M.; Rützler, K. *Contrib. Zool.* **2002**, *71*, 171–176.
- (3) Wratten, S. J.; Faulkner, D. J.; Hirotsu, K.; Clardy, J. *Tetrahedron Lett.* **1978**, 4345.
- (4) Avilés, E.; Rodríguez, A. D. *Org. Lett.* **2010**, *12*, 5290.
- (5) Le Roch, K. G.; Zhou, Y.; Blair, P. L.; Grainger, M.; Moch, J. K.; Haynes, J. D.; De La Vega, P.; Holder, A. A.; Batalov, S.; Carucci, D. J. *Science* **2003**, *301*, 1503.
- (6) Prudhomme, J.; McDaniel, E.; Ponts, N.; Bertani, S.; Fenical, W.; Jensen, P.; Le Roch, K. *PLoS ONE*, **2008**, *3*(6): e2335. doi:10.1371/journal.pone.0002335.
- (7) Collins, L. A.; Franzblau, S. G. *Antimicrob. Agents Chemother.* **1997**, *41*, 1004–1009.
- (8) Falzari, K.; Zhu, Z.; Pan, D.; Liu, H.; Hongmanee, P.; Franzblau, S. G. *Antimicrob. Agents Chemother.* **2005**, *49*, 1447.

$^1\text{H}$  NMR (700 MHz,  $\text{CDCl}_3$ )

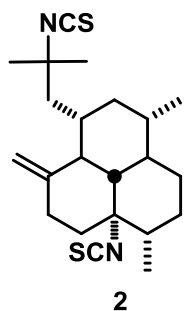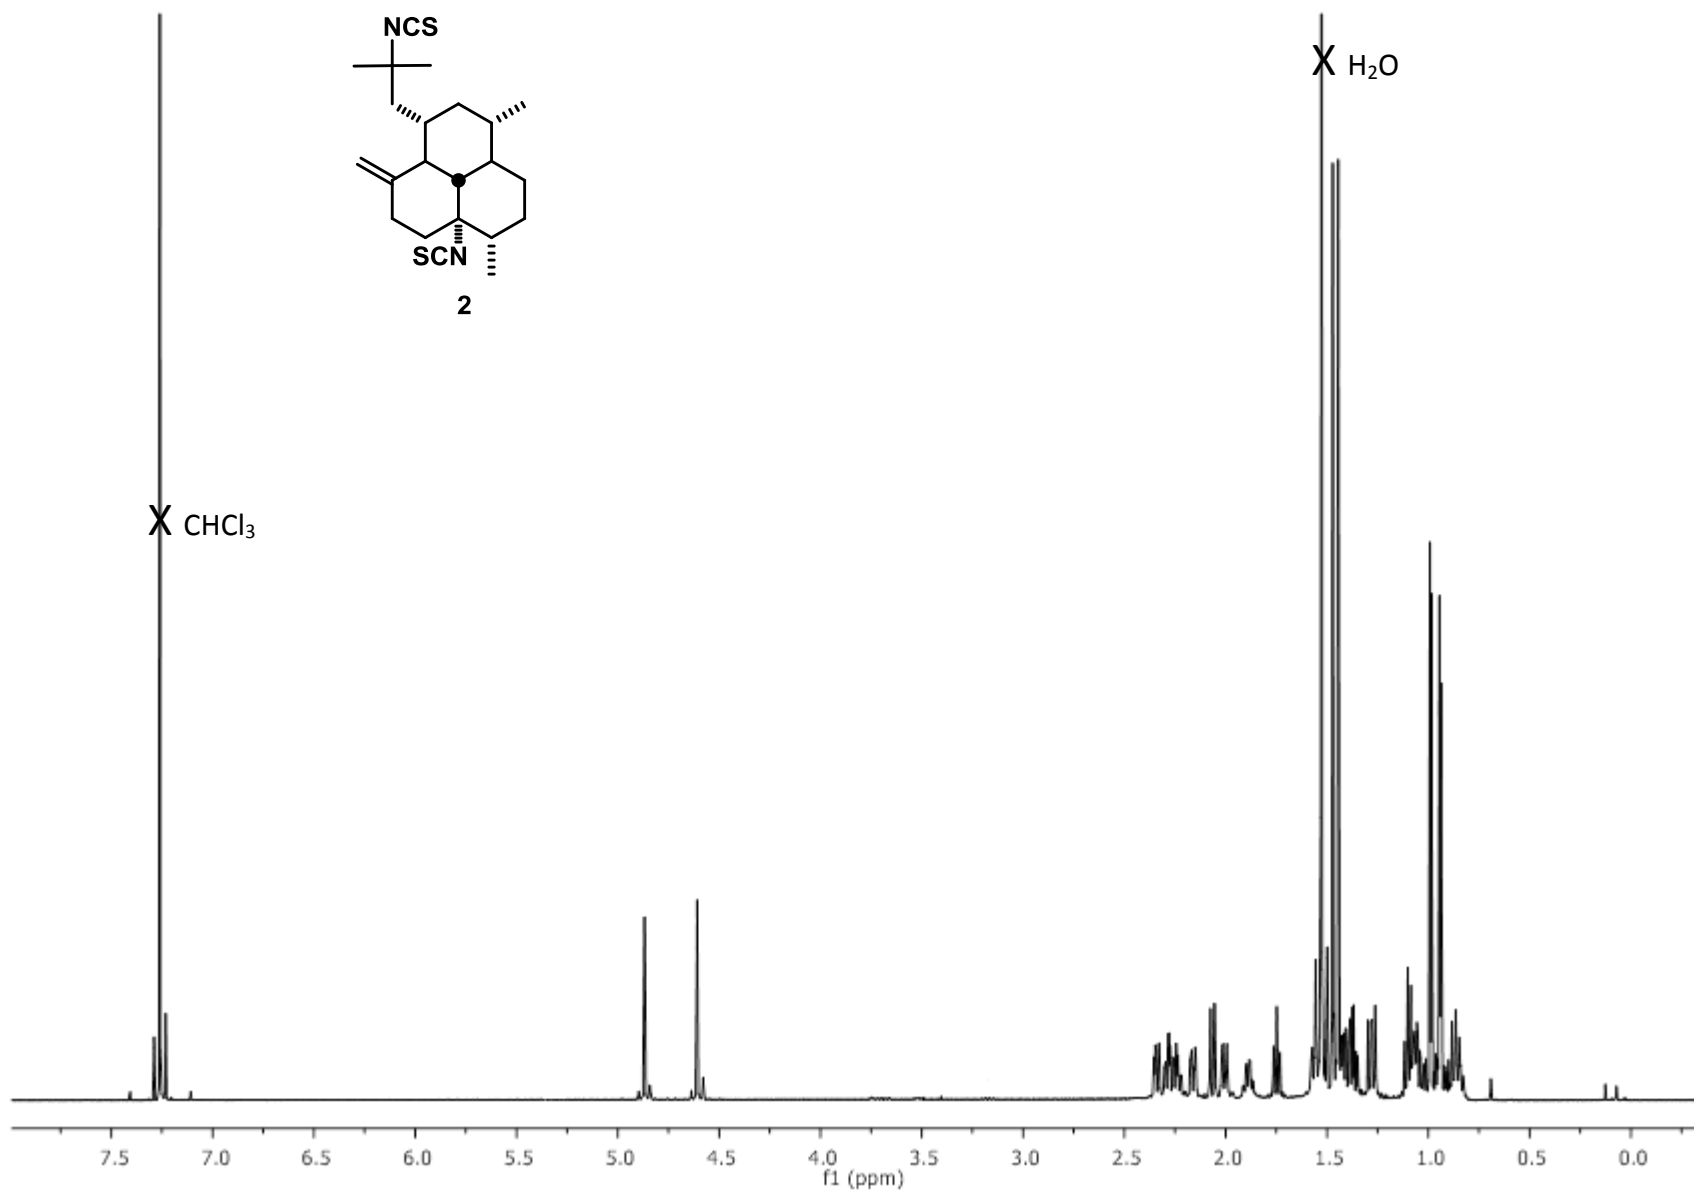



$^{13}\text{C}$  NMR (175 MHz,  $\text{CDCl}_3$ )

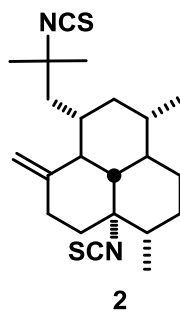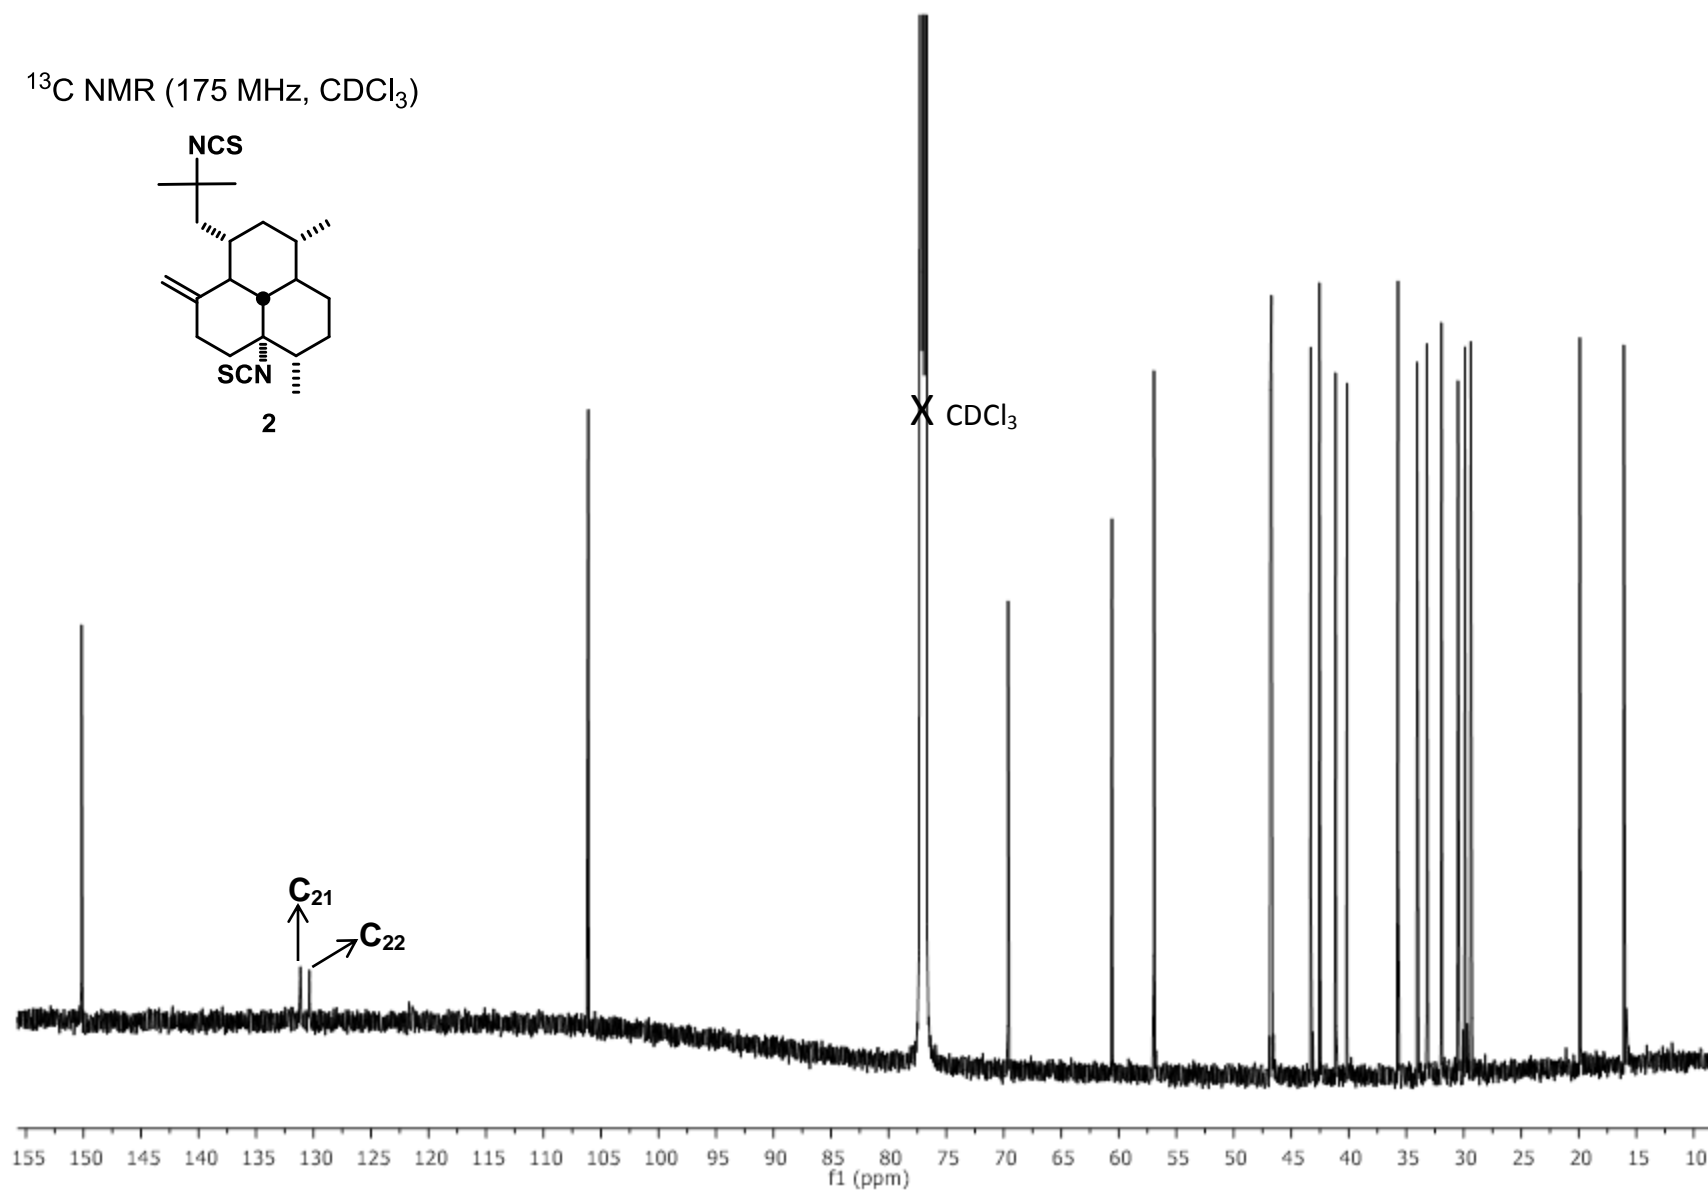

$^1\text{H}$  NMR (700 MHz,  $\text{CDCl}_3$ )

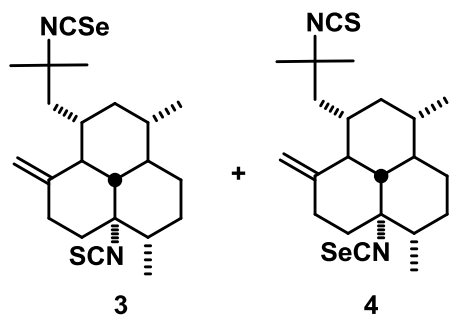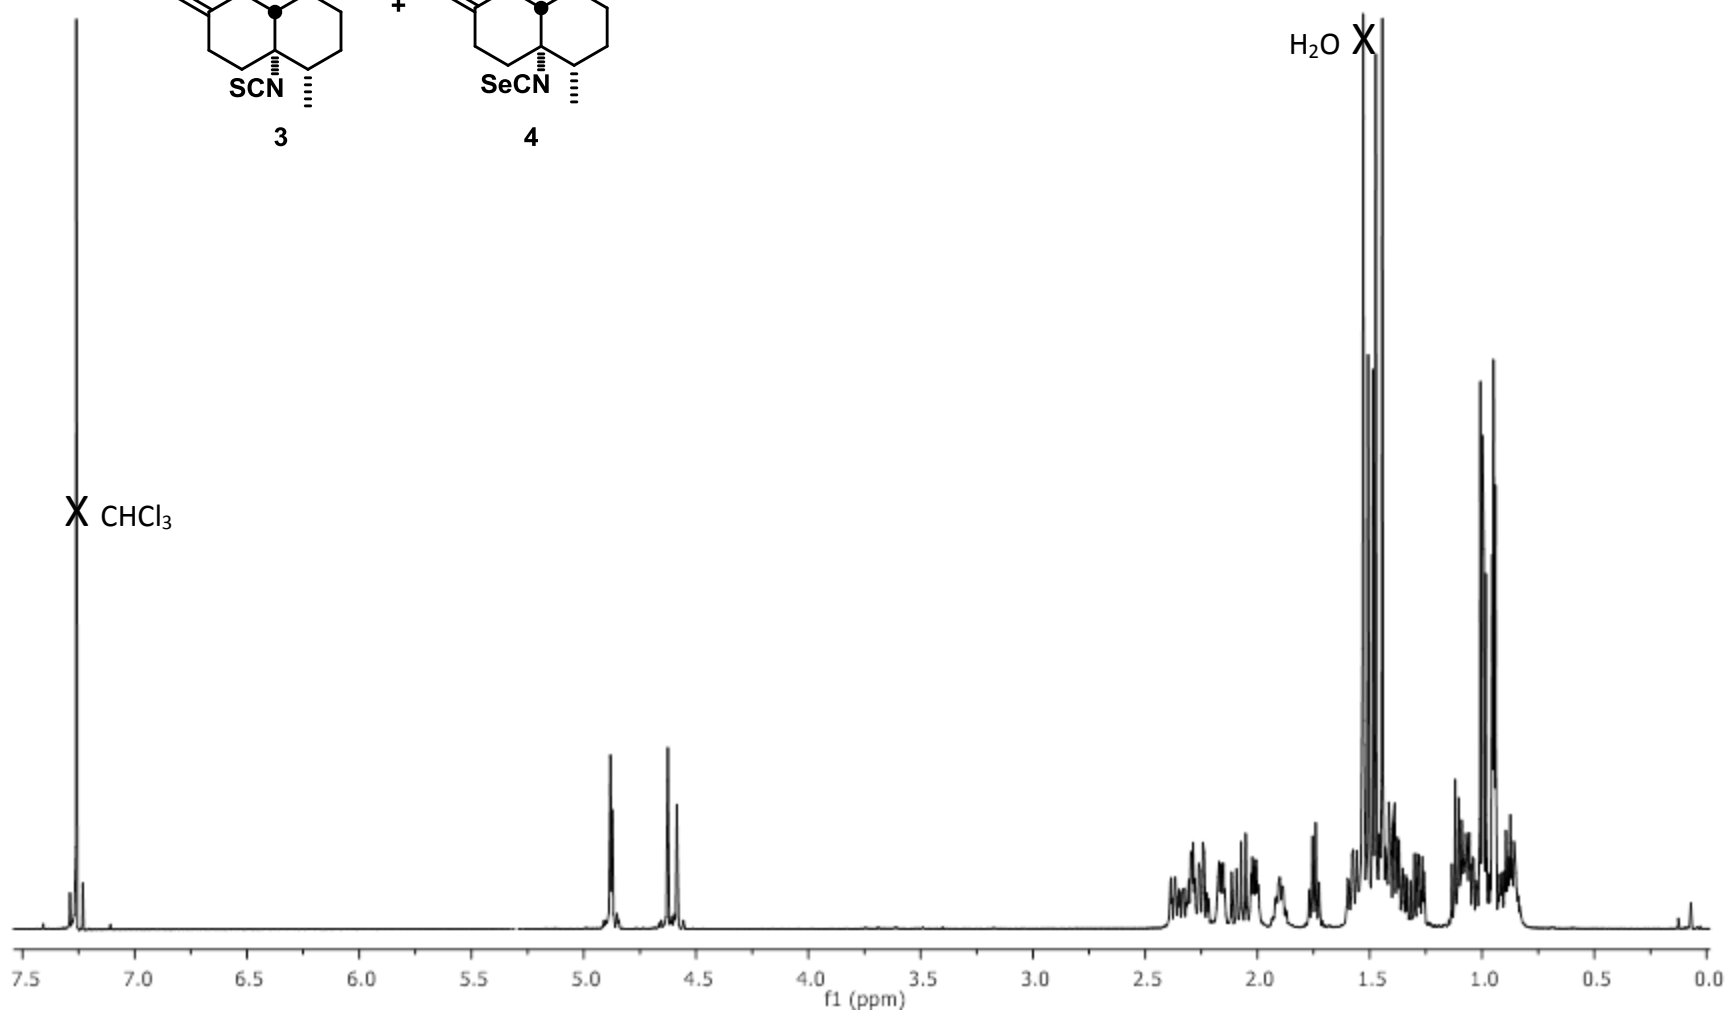

$^{13}\text{C}$  NMR (175 MHz,  $\text{CDCl}_3$ )

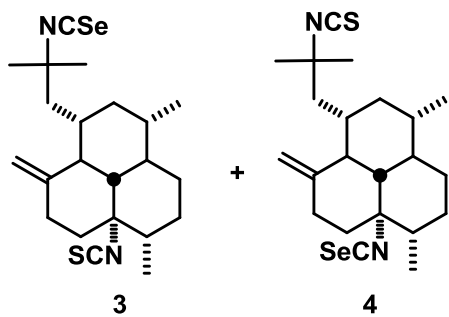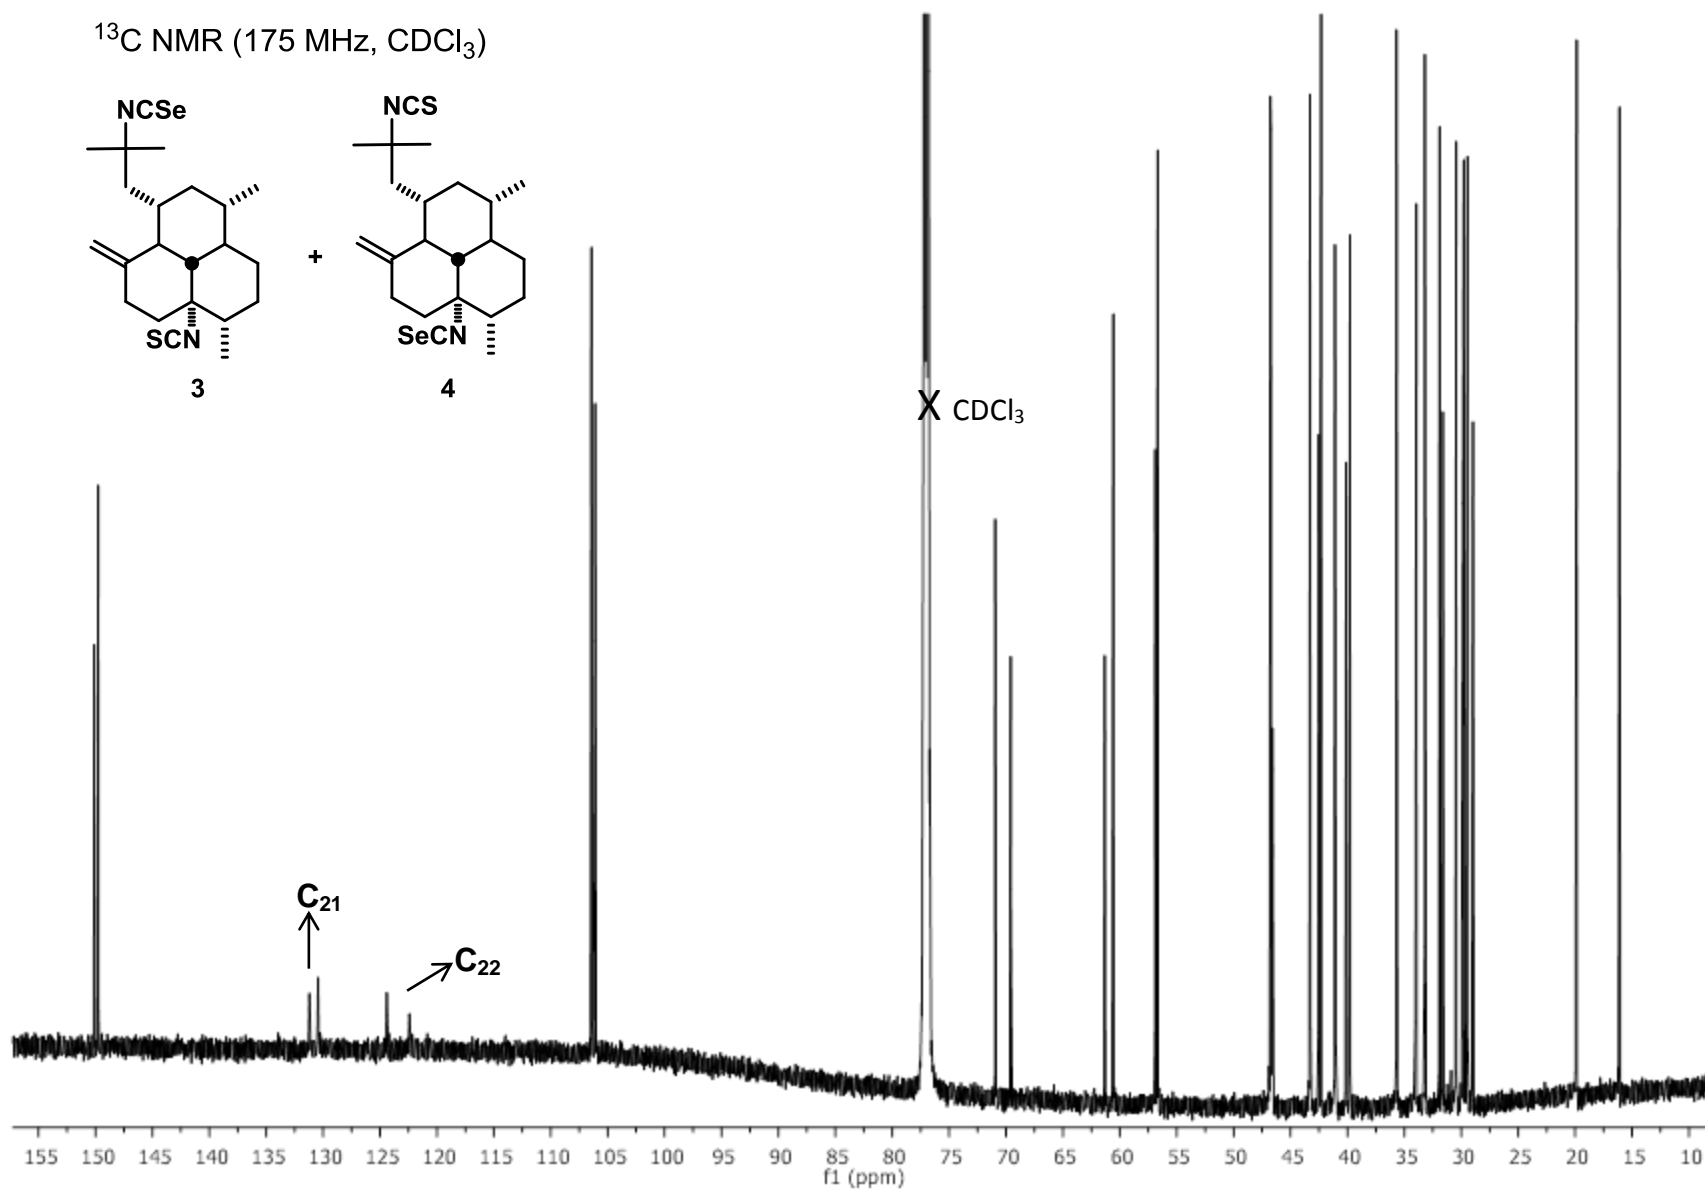

$^1\text{H}$  NMR (700 MHz,  $\text{CDCl}_3$ )

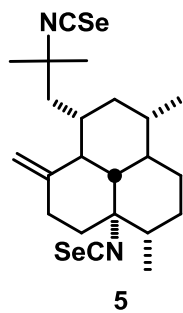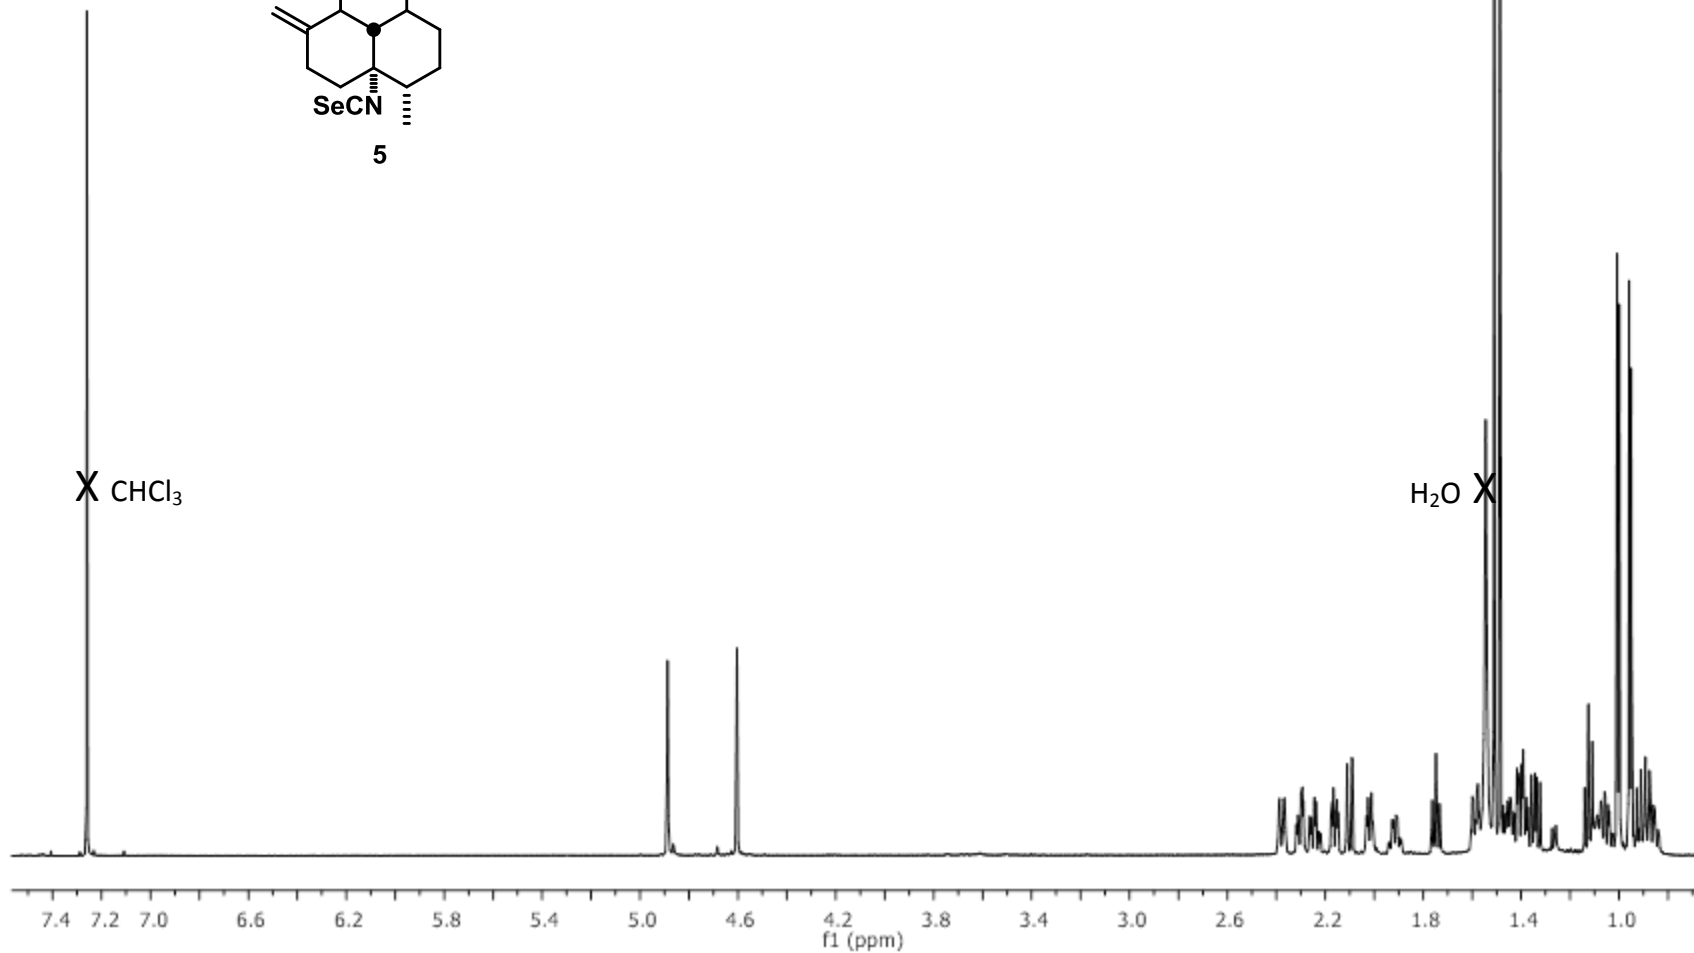

$^{13}\text{C}$  NMR (175 MHz,  $\text{CDCl}_3$ )

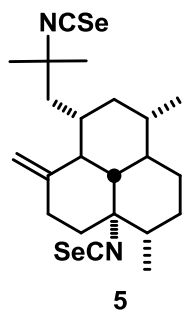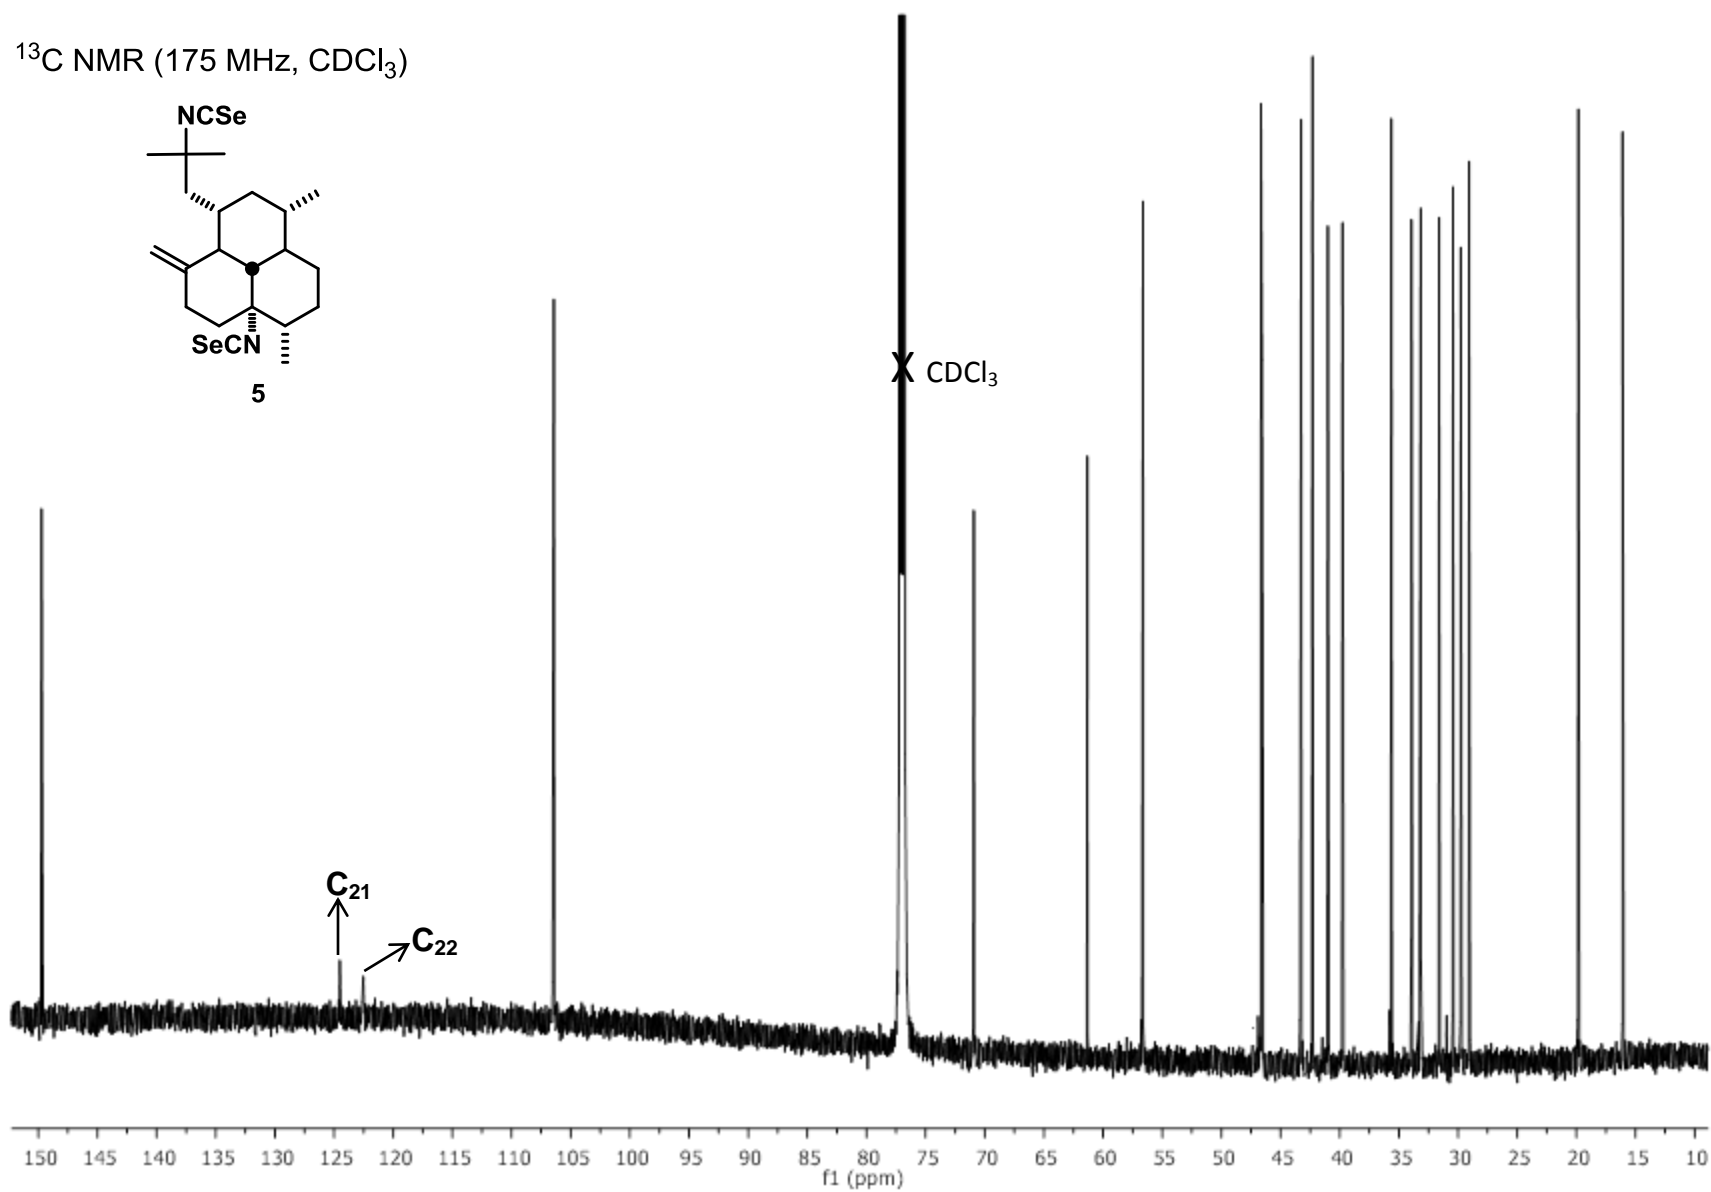

$^1\text{H}$  NMR (700 MHz,  $\text{CDCl}_3$ )

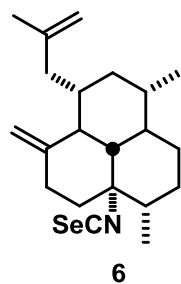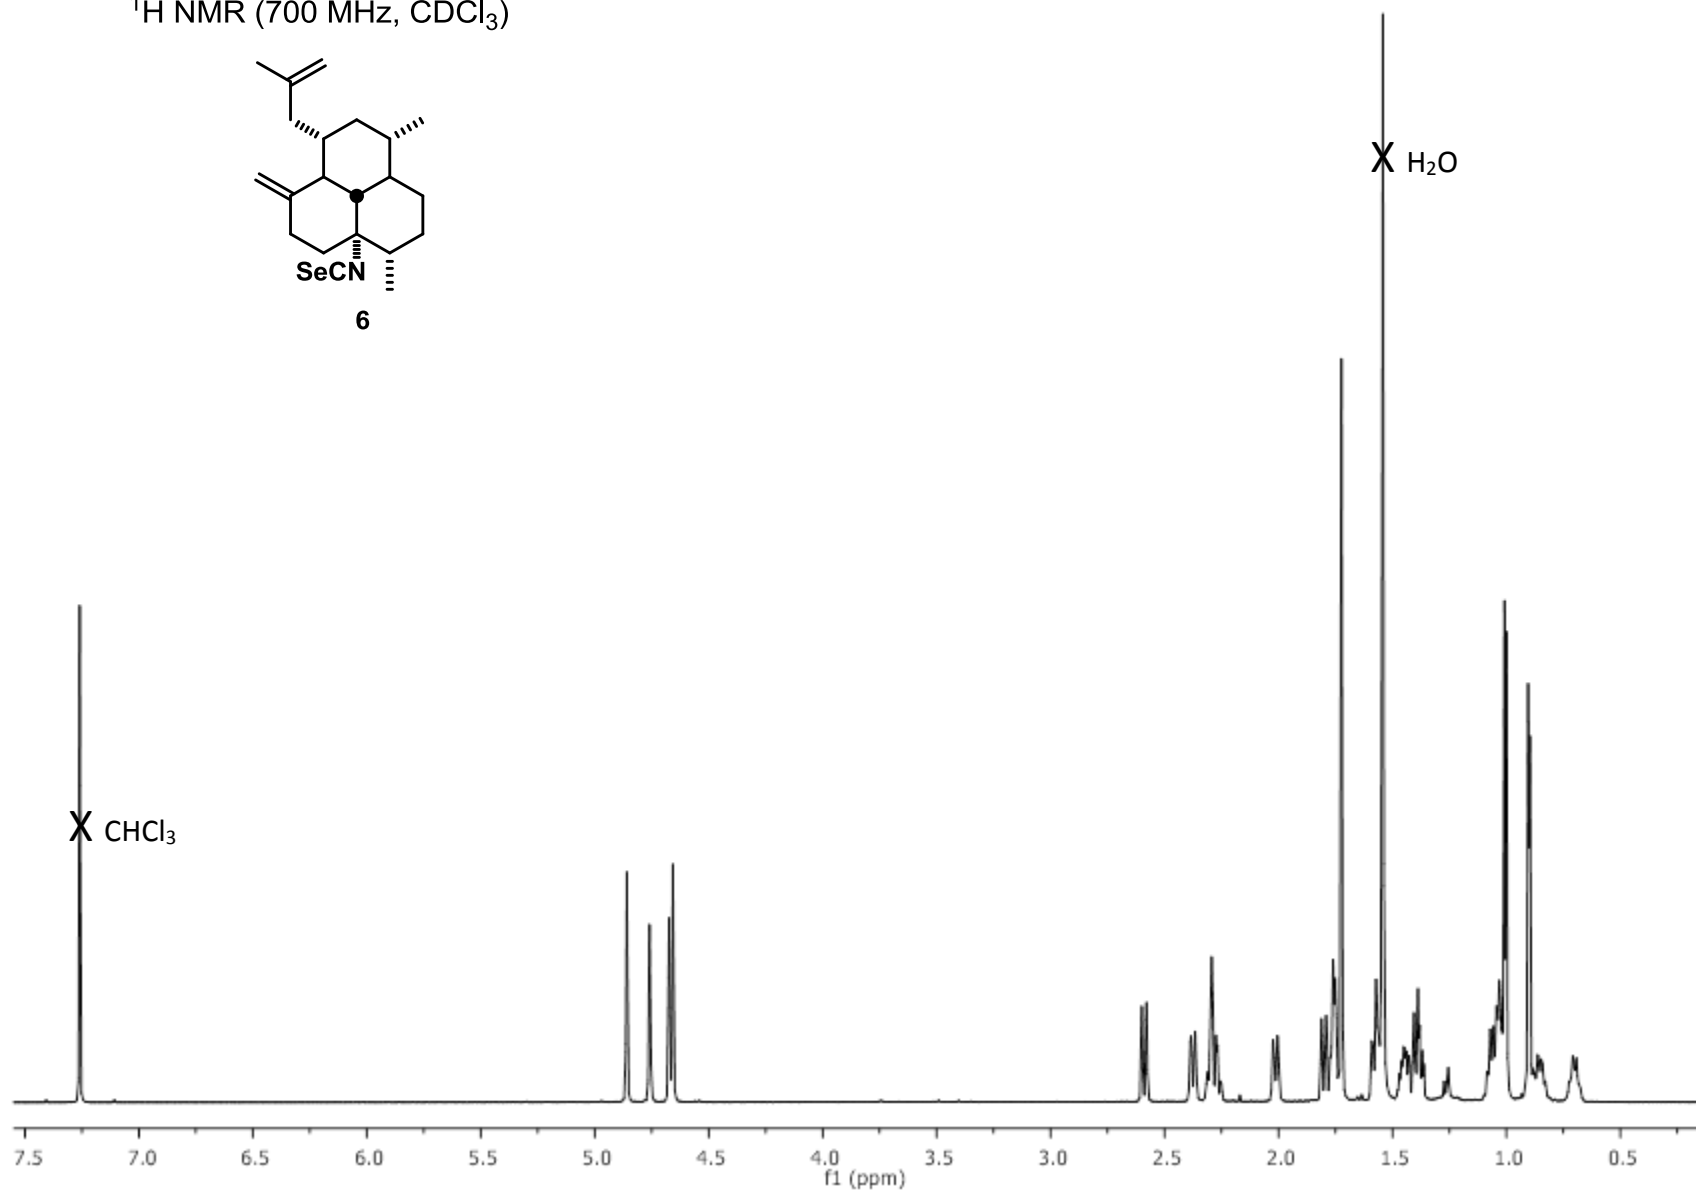

$^{13}\text{C}$  NMR (175 MHz,  $\text{CDCl}_3$ )

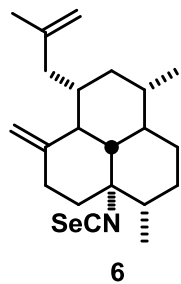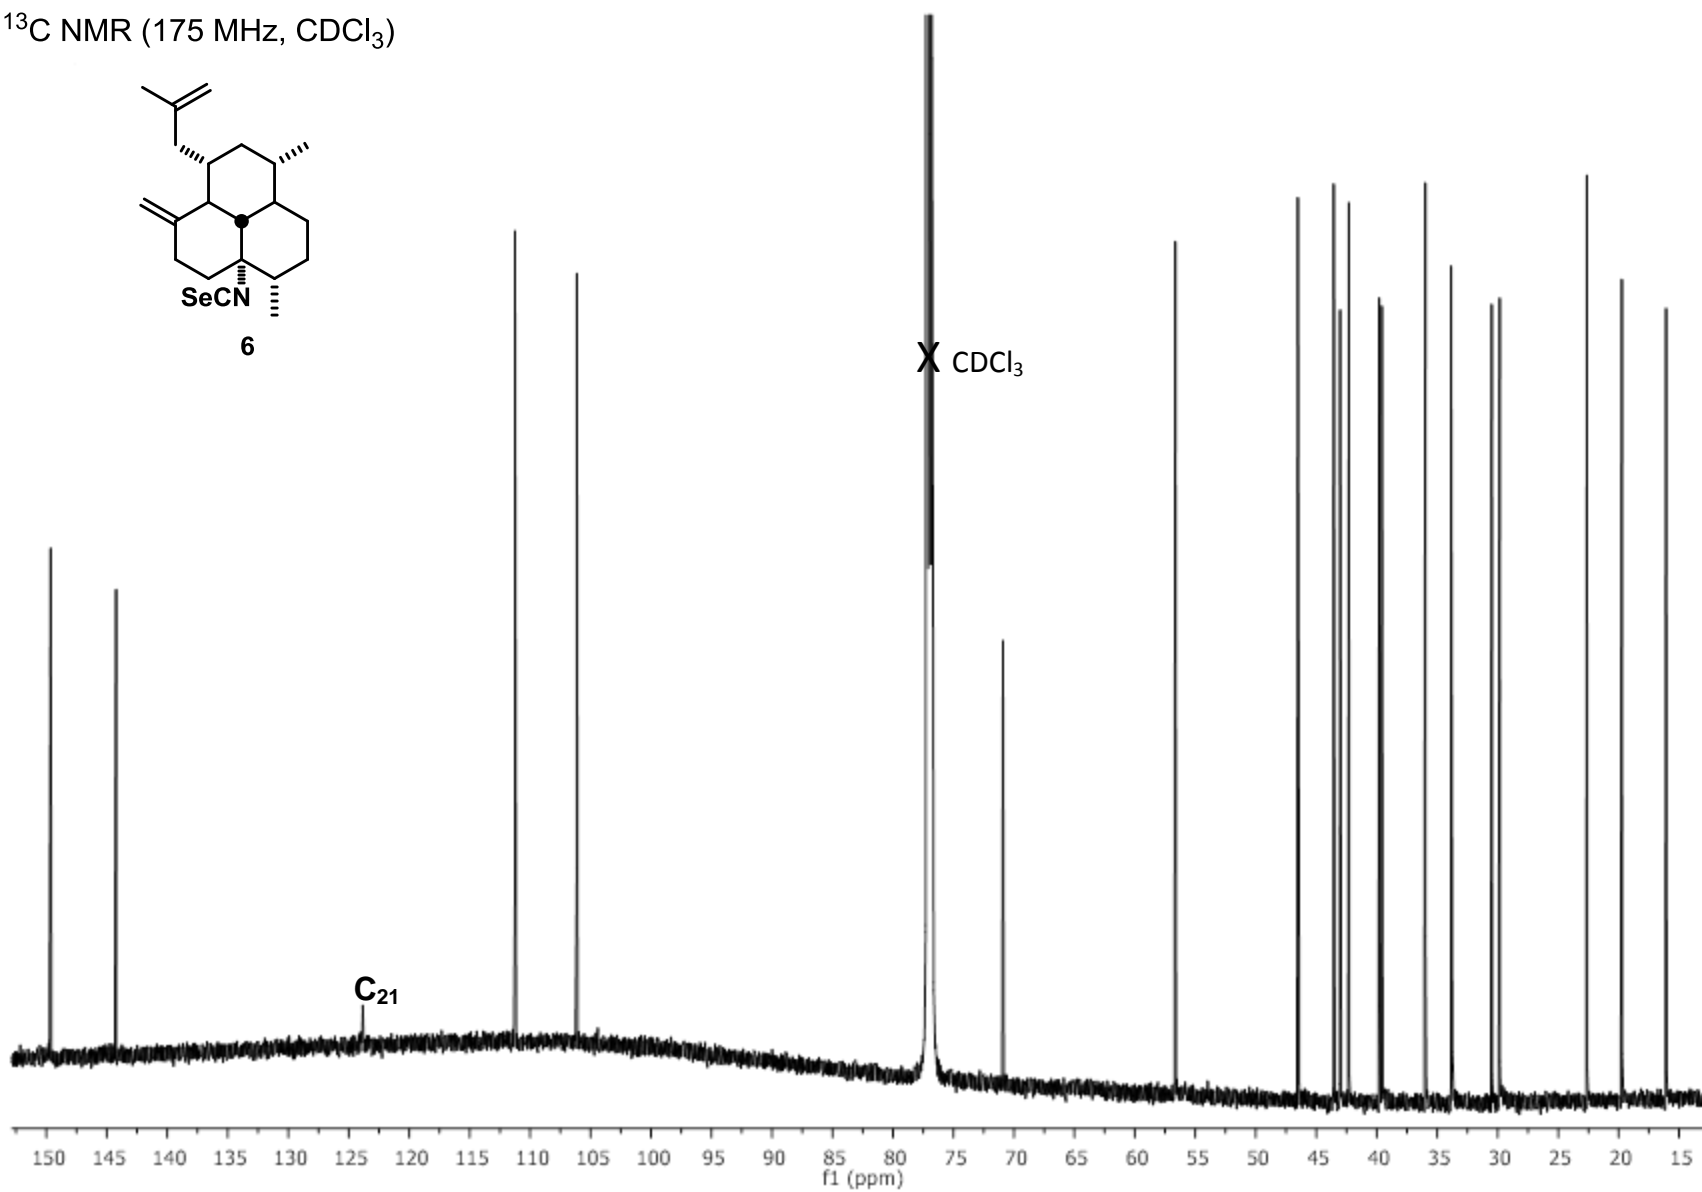

## Elemental Composition Report: HREIMS

| Mass     | Calc. Mass | mDa | PPM | DBE  | i-FIT  | Formula |     |    |                     |
|----------|------------|-----|-----|------|--------|---------|-----|----|---------------------|
| 388.2007 | 388.2007   | 0.0 | 0.0 | 8.0  | 134.0  | C22     | H32 | N2 | S2 <sup>a</sup>     |
| 436.1459 | 436.1451   | 0.8 | 1.8 | 9.0  | 9.4    | C22     | H32 | N2 | S 80Se <sup>b</sup> |
| 484.0902 | 484.0896   | 0.6 | 1.2 | 10.0 | 1116.0 | C22     | H32 | N2 | 80Se2 <sup>c</sup>  |
| 377.1626 | 377.1622   | 0.4 | 1.1 | 8.0  | 58.8   | C21     | H31 | N  | 80Se <sup>d</sup>   |

<sup>a</sup> Compound **2**, <sup>b</sup> Compounds **3:4**, <sup>c</sup> Compound **5**, <sup>d</sup> Compound **6**
